# Supplementary material
Source: PubMed Central journal article supplement (PMC6505387)
Supplement: TX-008-C8TX00260F-s001.pdf [file TX-008-C8TX00260F-s001.pdf]

# **Nitrogen doped carbon quantum dots demonstrate no toxicity under *in vitro* conditions in cervical cell line and *in vivo* in Swiss albino mouse**

**Vimal Singh<sup>a#</sup>, Sunayana Kashyap<sup>a#</sup>, Umakant Yadav<sup>a</sup>, Anchal Srivastava<sup>b</sup>, Ajay Vikram Singh<sup>c</sup>, Rajesh Kumar Singh<sup>d</sup>, Santosh Kumar Singh<sup>d</sup>, Preeti S. Saxena<sup>a\*</sup>**

<sup>a</sup>Department of Zoology, Institute of Science, Banaras Hindu University, Varanasi-221005, India

<sup>b</sup>Department of Physics, Institute of Science, Banaras Hindu University, Varanasi-221005, India

<sup>c</sup>Max Planck Institute for Intelligent Systems, Heisenbergstr. 3, Stuttgart, 70569, Germany

<sup>d</sup>Centre of Experimental Medicine and Surgery, Institute of Medical Science, Banaras Hindu University, Varanasi-221005, India

\*Corresponding author: Dr. Preeti S. Saxena

E-Mail ID : [pssaxena@rediffmail.com](mailto:pssaxena@rediffmail.com)

Phone No.: +919450593210,

#Equal contribution

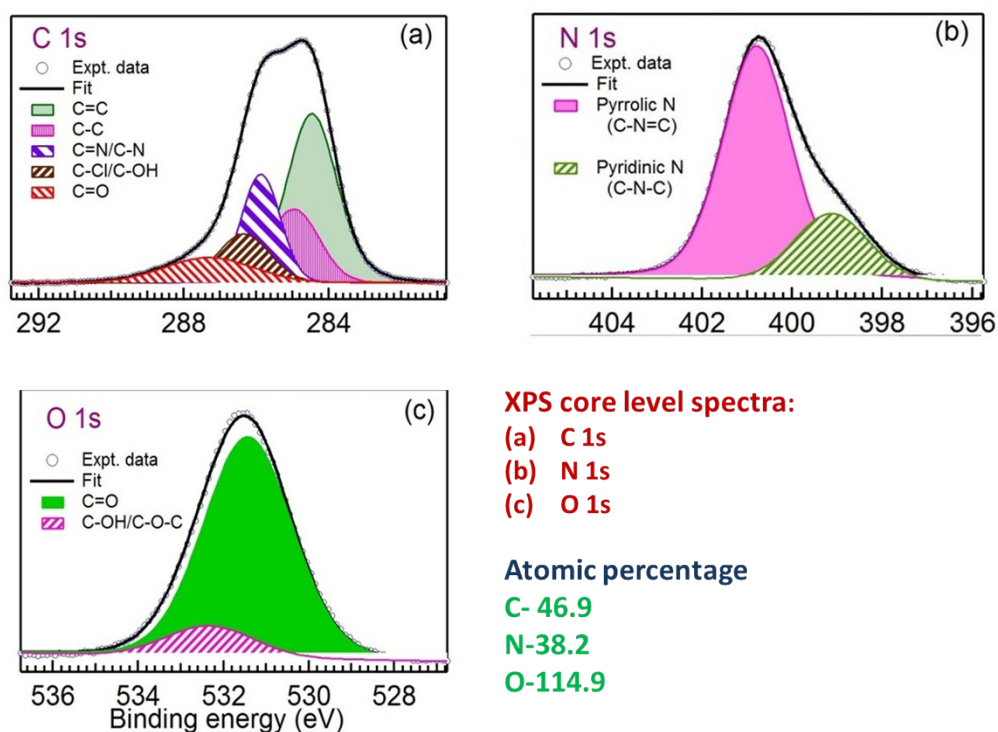

**Fig. S1.** XPS survey scan of the as-prepared NCQDs. (a) Survey, high resolution C1s (b), N1s (c), and O1s (Published in ISSS Journal of micro and smart systems, DOI: 10.1007/s41683-017-0011-1)<sup>1</sup>

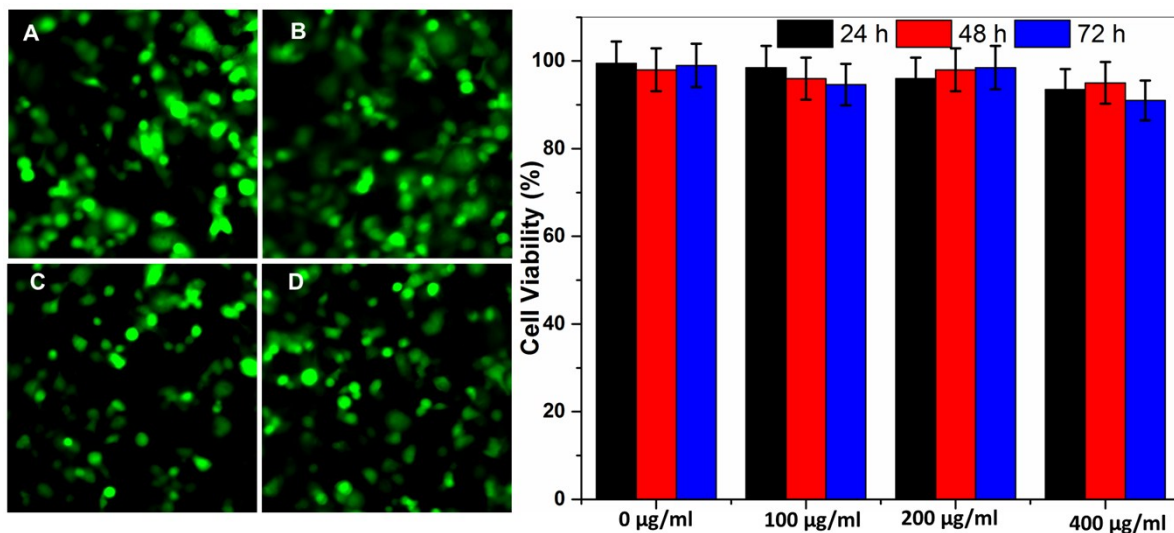

**Fig. S2.** Live/dead cell viability/cytotoxicity assay using AO/EtBr staining depicting the cytotoxic effects of NCQDs in Lungs alveolar A549 cell line. (A-D) Fluorescence microscope images of viable cells stained with AO (green) and nonviable cells stained with EtBr (red). Percentage of viable cells treated with 0, 100, 200 and 400 µg/ml NCQDs respectively.

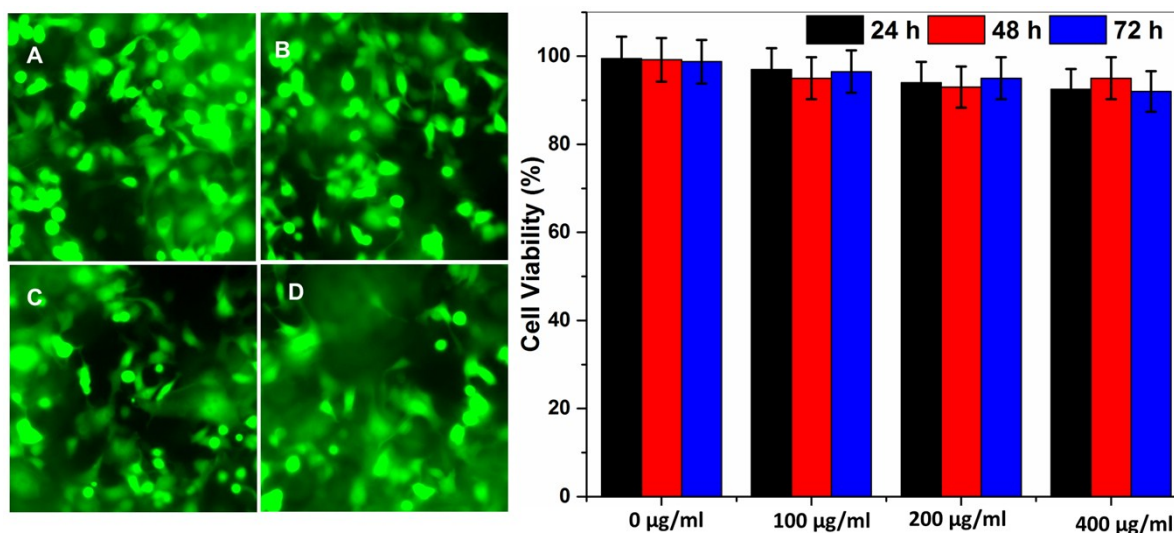

**Fig. S3.** Live/dead cell viability/cytotoxicity assay using AO/EtBr staining depicting the cytotoxic effects of NCQDs in Lungs alveolar A549 cell line. (A-D) Fluorescence microscope images of viable cells stained with AO (green) and nonviable cells stained with EtBr (red). Percentage of viable cells treated with 0,100, 200 and 400  $\mu\text{g/ml}$  NCQDs respectively.

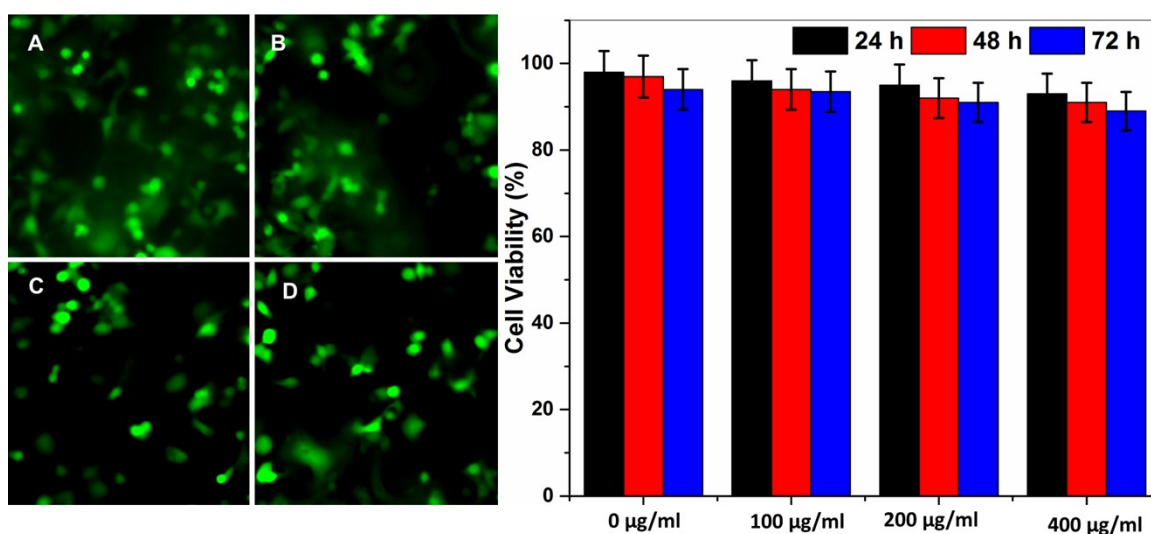

**Fig. S4.** Live/dead cell viability/cytotoxicity assay using AO/EtBr staining depicting the cytotoxic effects of NCQDs in human embryonic kidney HEK 293 cancer cell line. (A-D) Fluorescence microscope images of viable cells stained with AO (green) and nonviable cells stained with EtBr (red). Percentage of viable cells treated with 0,100, 200 and 400  $\mu\text{g/ml}$  NCQDs respectively.

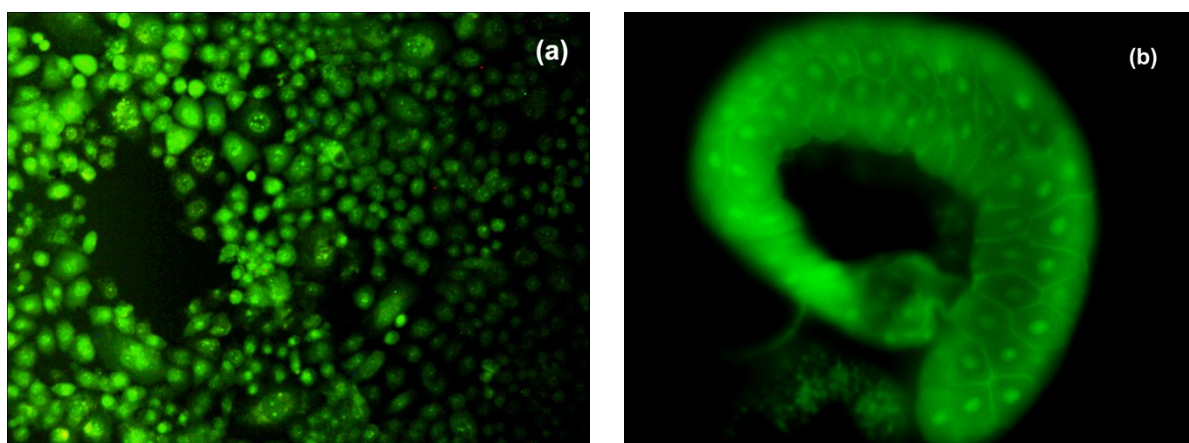

**Fig. S5.** Fluorescence microscope image of (a) MCF-7 cells and (b) salivary gland of drosophila larva after 30 minutes of incubation with NCQDs.

#### Reference

- 1 V. Singh, V. Kumar, U. Yadav, R. K. Srivastava, V. N. Singh, A. Banerjee, S. Chakraborty, A. K. Shukla, D. K. Misra, R. Ahuja, A. Srivastava and P. S. Saxena, *ISSS J. Micro Smart Syst.*, 2017, **6**, 109–117.
